# Supplementary material for: The effects of resistance training with blood flow restriction on muscle strength, muscle hypertrophy and functionality in patients with osteoarthritis and rheumatoid arthritis: A systematic review with meta-analysis
Source: PLOS journal article supplement (doi:10.1371/journal.pone.0259574), 2021-11-10
Supplement: S4 (10.1371/journal.pone.0259574.s004) [file journal.pone.0259574.s004]

**S4 file (A).** Supplemental appendix: Individual analysis (Reviewer #1) for the risk of bias of the studies using the risk of bias tool 2.0 (ROB2).

| First author name    | Randomization process | Deviations from the intended interventions | Missing results data | The measurement result | Selection of the result reported | General trend |
|----------------------|-----------------------|--------------------------------------------|----------------------|------------------------|----------------------------------|---------------|
| Rodrigues et al.(23) | High                  | Some concerns                              | Low *                | Low                    | Low                              | High          |
| Bryk et al.(25)      | High                  | Some concerns                              | Low                  | Low                    | Low                              | High          |
| Ferraz et al.(24)    | High                  | Some concerns                              | Low                  | Some concerns          | Low                              | High          |
| Harper et al.(22)    | High                  | Some concerns                              | Low                  | Low                    | Low                              | High          |
| Jønsson et al.(50)   | Low                   | Low                                        | Low                  | Low                    | Low                              | Low           |

Abbreviation: \*, difference found between reviewer #1 and reviewer #2.

**S4 file (B).** Supplemental appendix: Individual analysis (Reviewer #2) for the risk of bias of the studies using the risk of bias tool 2.0 (ROB2).

| First author name    | Randomization process | Deviations from the intended interventions | Missing results data | The measurement result | Selection of the result reported | General trend |
|----------------------|-----------------------|--------------------------------------------|----------------------|------------------------|----------------------------------|---------------|
| Rodrigues et al.(23) | High                  | Some concerns                              | Some concerns *      | Low                    | Low                              | High          |
| Bryk et al.(25)      | High                  | Some concerns                              | Low                  | Low                    | Low                              | High          |
| Ferraz et al.(24)    | High                  | Some concerns                              | Low                  | Some concerns          | Low                              | High          |
| Harper et al.(22)    | High                  | Some concerns                              | Low                  | Low                    | Low                              | High          |
| Jønsson et al.(50)   | Low                   | Low                                        | Low                  | Low                    | Low                              | Low           |

Abbreviation: \*, difference found between reviewer #1 and reviewer #2.
